# Supplementary material
Source: PubMed Central journal article supplement (PMC2742137)
Supplement: 081869v2_1.pdf [file 081869v2_1.pdf]

## Revised Appendix 1 (as supplied by the authors): Outcomes among newborns without major anomalies\*

Revised 2009 Oct 1 (headings for the final 2 columns had been reversed)

|                                                                               | Planned Home<br>Birth with Midwife<br>n=2882 | Planned Hospital<br>Birth with Midwife<br>n = 4723 | Planned Hospital<br>Birth with Physician<br>n = 5294 |
|-------------------------------------------------------------------------------|----------------------------------------------|----------------------------------------------------|------------------------------------------------------|
|                                                                               | n. (%)                                       | n. (%)                                             | n. (%)                                               |
| Excluded newborns with anomalies                                              | 17 (0.6)                                     | 29 (0.6)                                           | 37 (0.7)                                             |
| Perinatal death                                                               | 1 (0)                                        | 3 (0.1)                                            | 3 (0.1)                                              |
| Apgar score <7 at 1 min                                                       | 240 (8.4)                                    | 531 (11.3)                                         | 581 (11.0)                                           |
| Apgar score <7 at 5 min                                                       | 26 (0.9)                                     | 43 (0.9)                                           | 52 (1.0)                                             |
| Meconium Aspiration                                                           | 9 (0.3)                                      | 33 (0.7)                                           | 20 (0.4)                                             |
| Asphyxia                                                                      | 6 (0.2)                                      | 14 (0.3)                                           | 14 (0.3)                                             |
| Birth Trauma <sup>†</sup>                                                     | 7 (0.2)                                      | 35 (0.7)                                           | 49 (0.9)                                             |
| Resuscitation at birth                                                        |                                              |                                                    |                                                      |
| IPPV per ETT <sup>‡</sup>                                                     | 10 (0.3)                                     | 16 (0.3)                                           | 26 (0.5)                                             |
| Chest Compressions                                                            | 2 (0.1)                                      | 4 (0.1)                                            | 6 (0.1)                                              |
| Drugs                                                                         | 7 (0.2)                                      | 32 (0.7)                                           | 113 (2.1)                                            |
| Birthweight < 2500 gm                                                         | 15 (0.5)                                     | 26 (0.6)                                           | 62 (1.2)                                             |
| Seizures                                                                      | 2 (0.1)                                      | 5 (0.1)                                            | 6 (0.1)                                              |
| Oxygen therapy > 24 hours                                                     | 22 (0.8)                                     | 94 (2.0)                                           | 109 (2.1)                                            |
| Assisted ventilation >24 hours                                                | 5 (0.2)                                      | 12 (0.3)                                           | 9 (0.2)                                              |
| Admission to hospital after home birth<br>or readmission after hospital birth | 84 (2.9)                                     | 59 (2.1)                                           | 142 (2.7)                                            |

\* Major anomalies encompassed neural tube defects, other malformations of the nervous system, anomalies of the cardiac and cardiovascular system, and chromosomal abnormalities.

<sup>†</sup> Subdural or cerebral hemorrhage, fracture of clavicle, long bones or skull, facial nerve injury, Erb's Palsy, or unspecified birth trauma.

<sup>‡</sup> Intermittent positive pressure via endotracheal tube.
